# Supplementary material for: Evaluation of an on-site sanitation intervention against childhood diarrhea and acute respiratory infection 1 to 3.5 years after implementation: Extended follow-up of a cluster-randomized controlled trial in rural Bangladesh
Source: PubMed Central journal article supplement (PMC9394830; doi:10.1371/journal.pmed.1004041), 2022-08-08
Supplement: pmed.1004041.s001.pdf [file pmed.1004041.s001.pdf]

**Table S1: CONSORT 2010 checklist of information to include when reporting a randomized trial**

| <b>Section/Topic</b>                  | <b>Item No</b> | <b>Checklist item</b>                                                                                                                 | <b>Reported on page No</b>                                                |
|---------------------------------------|----------------|---------------------------------------------------------------------------------------------------------------------------------------|---------------------------------------------------------------------------|
| <b>Title and abstract</b>             |                |                                                                                                                                       |                                                                           |
|                                       | 1a             | Identification as a randomised trial in the title                                                                                     | <u>Title</u>                                                              |
|                                       | 1b             | Structured summary of trial design, methods, results, and conclusions (for specific guidance see CONSORT for abstracts)               | <u>Abstract</u>                                                           |
| <b>Introduction</b>                   |                |                                                                                                                                       |                                                                           |
| Background and objectives             | 2a             | Scientific background and explanation of rationale                                                                                    | <u>Introduction</u>                                                       |
|                                       | 2b             | Specific objectives or hypotheses                                                                                                     | <u>Introduction, paragraph 5</u>                                          |
| <b>Methods</b>                        |                |                                                                                                                                       |                                                                           |
| Trial design                          | 3a             | Description of trial design (such as parallel, factorial) including allocation ratio                                                  | <u>Methods: Randomization and Masking, Interventions, Substudy Design</u> |
|                                       | 3b             | Important changes to methods after trial commencement (such as eligibility criteria), with reasons                                    | <u>NA</u>                                                                 |
| Participants                          | 4a             | Eligibility criteria for participants                                                                                                 | <u>Methods: Randomization and Masking, Substudy Design</u>                |
|                                       | 4b             | Settings and locations where the data were collected                                                                                  | <u>Methods: Randomization and Masking</u>                                 |
| Interventions                         | 5              | The interventions for each group with sufficient details to allow replication, including how and when they were actually administered | <u>Methods: Interventions</u>                                             |
| Outcomes                              | 6a             | Completely defined pre-specified primary and secondary outcome measures, including how and when they were assessed                    | <u>Methods: Study Outcomes</u>                                            |
|                                       | 6b             | Any changes to trial outcomes after the trial commenced, with reasons                                                                 | <u>NA</u>                                                                 |
| Sample size                           | 7a             | How sample size was determined                                                                                                        | <u>Methods: Statistical Analysis, second paragraph</u>                    |
|                                       | 7b             | When applicable, explanation of any interim analyses and stopping guidelines                                                          | <u>NA</u>                                                                 |
| Randomisation:<br>Sequence generation | 8a             | Method used to generate the random allocation sequence                                                                                | <u>Methods: Randomization and Masking</u>                                 |
|                                       | 8b             | Type of randomisation; details of any restriction (such as blocking and block size)                                                   | <u>Methods: Randomization and Masking</u>                                 |

|                                                      |     |                                                                                                                                                                                             |                                                                         |
|------------------------------------------------------|-----|---------------------------------------------------------------------------------------------------------------------------------------------------------------------------------------------|-------------------------------------------------------------------------|
| Allocation concealment mechanism                     | 9   | Mechanism used to implement the random allocation sequence (such as sequentially numbered containers), describing any steps taken to conceal the sequence until interventions were assigned | Methods: Randomization and Masking                                      |
| Implementation                                       | 10  | Who generated the random allocation sequence, who enrolled participants, and who assigned participants to interventions                                                                     | Methods: Randomization and Masking                                      |
| Blinding                                             | 11a | If done, who was blinded after assignment to interventions (for example, participants, care providers, those assessing outcomes) and how                                                    | Methods: Randomization and Masking                                      |
|                                                      | 11b | If relevant, description of the similarity of interventions                                                                                                                                 | NA                                                                      |
| Statistical methods                                  | 12a | Statistical methods used to compare groups for primary and secondary outcomes                                                                                                               | Methods: Statistical Analysis                                           |
|                                                      | 12b | Methods for additional analyses, such as subgroup analyses and adjusted analyses                                                                                                            | Methods: Effect Modification                                            |
| <b>Results</b>                                       |     |                                                                                                                                                                                             |                                                                         |
| Participant flow (a diagram is strongly recommended) | 13a | For each group, the numbers of participants who were randomly assigned, received intended treatment, and were analysed for the primary outcome                                              | Figure S1                                                               |
|                                                      | 13b | For each group, losses and exclusions after randomisation, together with reasons                                                                                                            | Figure S1                                                               |
| Recruitment                                          | 14a | Dates defining the periods of recruitment and follow-up                                                                                                                                     | Results, second paragraph                                               |
|                                                      | 14b | Why the trial ended or was stopped                                                                                                                                                          | NA                                                                      |
| Baseline data                                        | 15  | A table showing baseline demographic and clinical characteristics for each group                                                                                                            | Previously published (described in text under Results, first paragraph) |
| Numbers analysed                                     | 16  | For each group, number of participants (denominator) included in each analysis and whether the analysis was by original assigned groups                                                     | Results, first paragraph; Results: Intervention Effects                 |
| Outcomes and estimation                              | 17a | For each primary and secondary outcome, results for each group, and the estimated effect size and its precision (such as 95% confidence interval)                                           | Results: Intervention Effects; Table 1                                  |
|                                                      | 17b | For binary outcomes, presentation of both absolute and relative effect sizes is recommended                                                                                                 | Results: Intervention Effects; Table 1                                  |
| Ancillary analyses                                   | 18  | Results of any other analyses performed, including subgroup analyses and adjusted analyses, distinguishing pre-specified from exploratory                                                   | Results: Effect Modification; Table 2                                   |
| Harms                                                | 19  | All important harms or unintended effects in each group (for specific guidance see CONSORT for harms)                                                                                       | NA                                                                      |
| <b>Discussion</b>                                    |     |                                                                                                                                                                                             |                                                                         |
| Limitations                                          | 20  | Trial limitations, addressing sources of potential bias, imprecision, and, if relevant, multiplicity of analyses                                                                            | Discussion, fifth and sixth paragraphs                                  |
| Generalisability                                     | 21  | Generalisability (external validity, applicability) of the trial findings                                                                                                                   | Discussion, second, fourth, and fifth paragraphs                        |
| Interpretation                                       | 22  | Interpretation consistent with results, balancing benefits and harms, and considering other relevant evidence                                                                               | Discussion                                                              |

---

**Other information**

|              |    |                                                                                 |                                                        |
|--------------|----|---------------------------------------------------------------------------------|--------------------------------------------------------|
| Registration | 23 | Registration number and name of trial registry                                  | Abstract; Methods:<br><u>Randomization and Masking</u> |
| Protocol     | 24 | Where the full trial protocol can be accessed, if available                     | <u>Methods: Study Outcomes</u>                         |
| Funding      | 25 | Sources of funding and other support (such as supply of drugs), role of funders | <u>Funding</u>                                         |

---
