# Supplementary material for: Evaluation of an on-site sanitation intervention against childhood diarrhea and acute respiratory infection 1 to 3.5 years after implementation: Extended follow-up of a cluster-randomized controlled trial in rural Bangladesh
Source: PubMed Central journal article supplement (PMC9394830; doi:10.1371/journal.pmed.1004041), 2022-08-08
Supplement: pmed.1004041.s002.pdf [file pmed.1004041.s002.pdf]

**1 – 2 Years  
After  
Implementation**

**2 – 3.5 Years  
After Implementation**

**WASH-Benefits  
Parent Trial,  
Sanitation &  
Control Arms**

*5,277 child  
observations*

**Longitudinal  
Sub-Study,  
Sanitation &  
Control Arms**

*3,201 child  
observations*

*6,623 child  
observations*
