# Supplementary material for: Evaluation of an on-site sanitation intervention against childhood diarrhea and acute respiratory infection 1 to 3.5 years after implementation: Extended follow-up of a cluster-randomized controlled trial in rural Bangladesh
Source: PubMed Central journal article supplement (PMC9394830; doi:10.1371/journal.pmed.1004041), 2022-08-08
Supplement: pmed.1004041.s005.pdf [file pmed.1004041.s005.pdf]

# Prevalence of Bruising/Abrasion in Control Arm by Month of Follow-Up in Both Studies

Prevalence of Bruising/Abrasion and  
95% Credible Interval

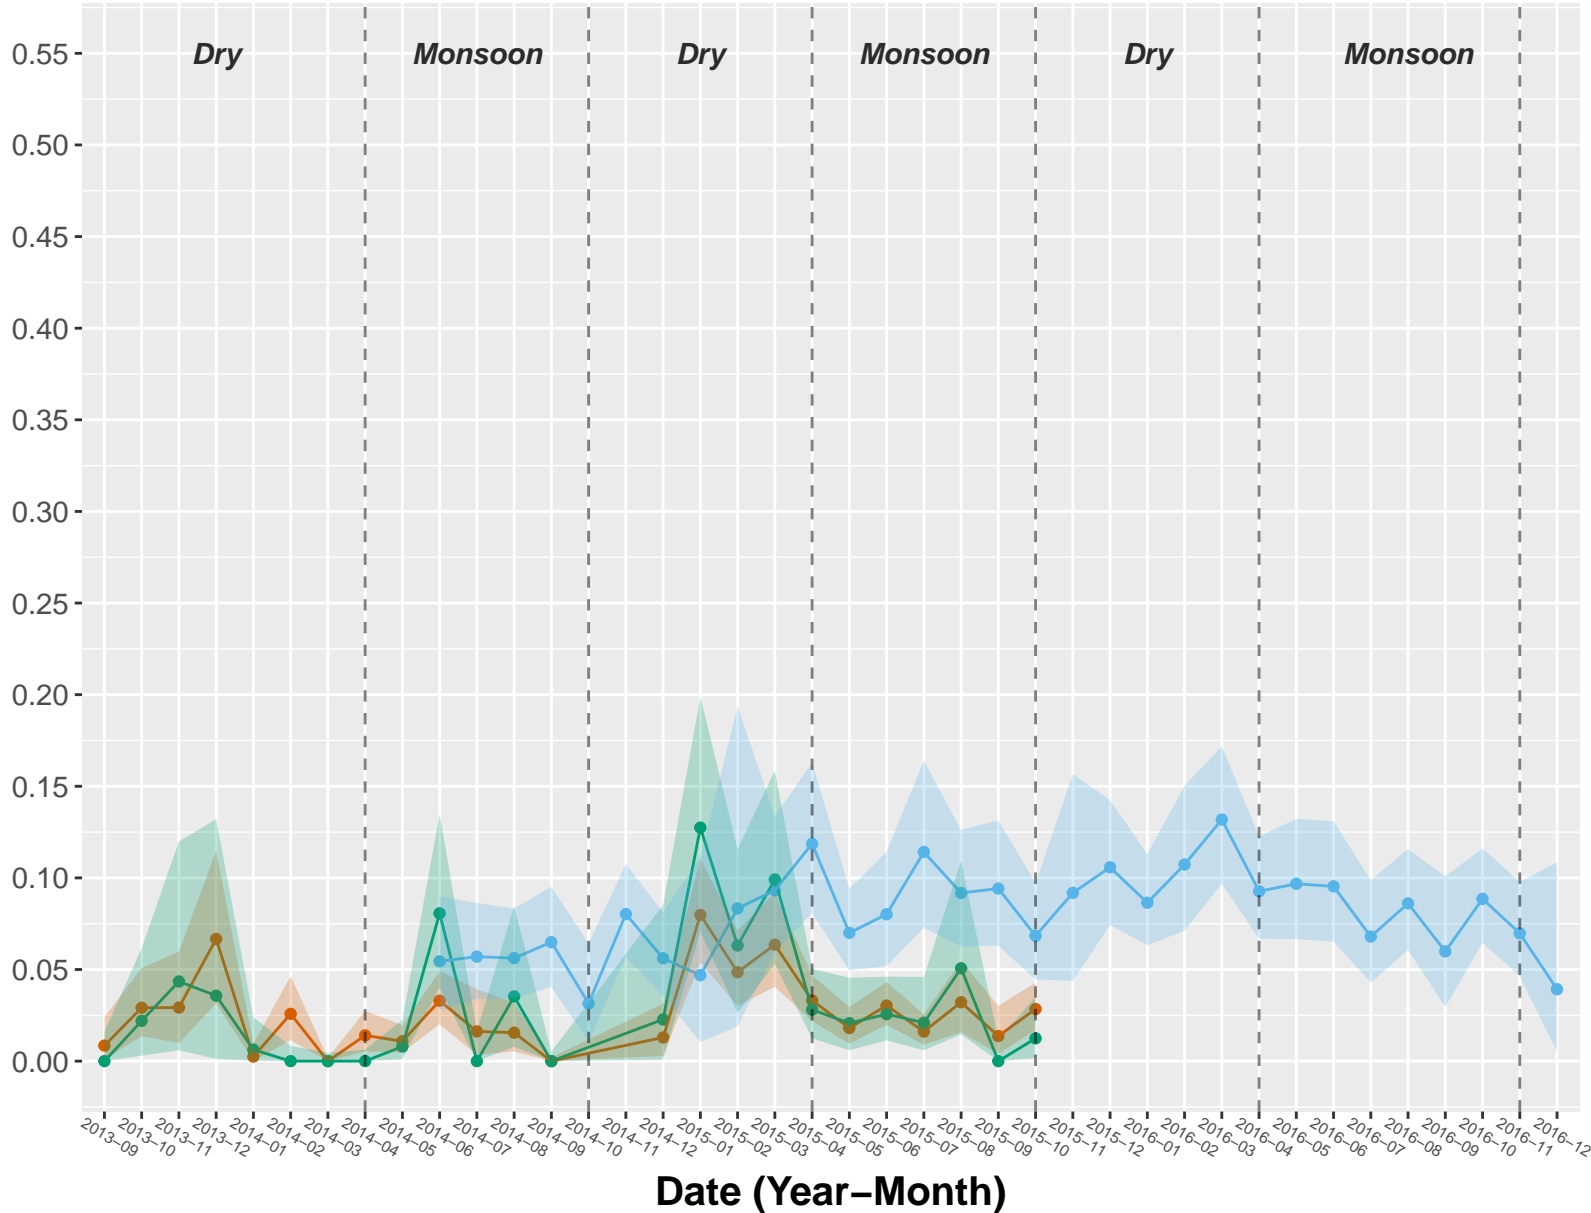

● Parent Trial, Overall   
 ● Parent Trial, Substudy Participants   
 ● Substudy
